# Supplementary material
Source: PubMed Central journal article supplement (PMC3104744)
Supplement: JCI44675sd.pdf [file JCI44675sd.pdf]

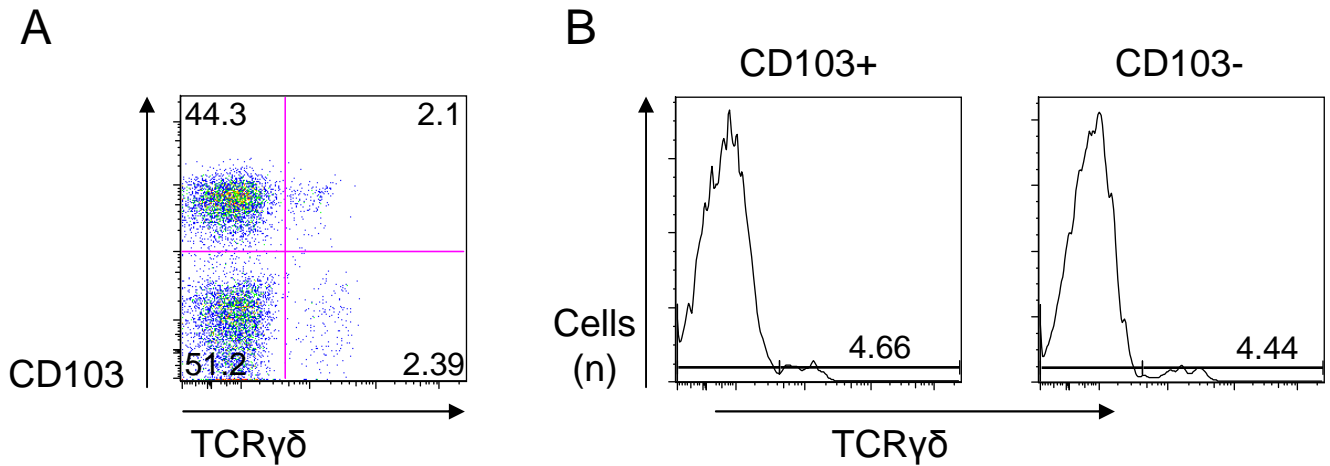

**SUPPLEMENTAL FIGURE 1.  $\gamma\delta$ -T cells form a minor population within the lung CD8+ T cells and contribute equally to the CD103+ and CD103- CD8+ T cell subsets.** A: FACS-plot showing TCR $\gamma\delta$  and CD103 expression on lung CD3+CD8+ T cells. Numbers indicate % of CD3+CD8+ cells within each quadrant. B: Histogramplots showing the percentage of  $\gamma\delta$ -T cells within lung CD103+ CD8+ (left) and CD103- CD8+ T cell population (right). Histogramplots show CD3+CD8+CD103+ (left) and CD3+CD8+CD103- (right) T cells within the lymphocytegate. All FACS-plots are representative for 5 patients.

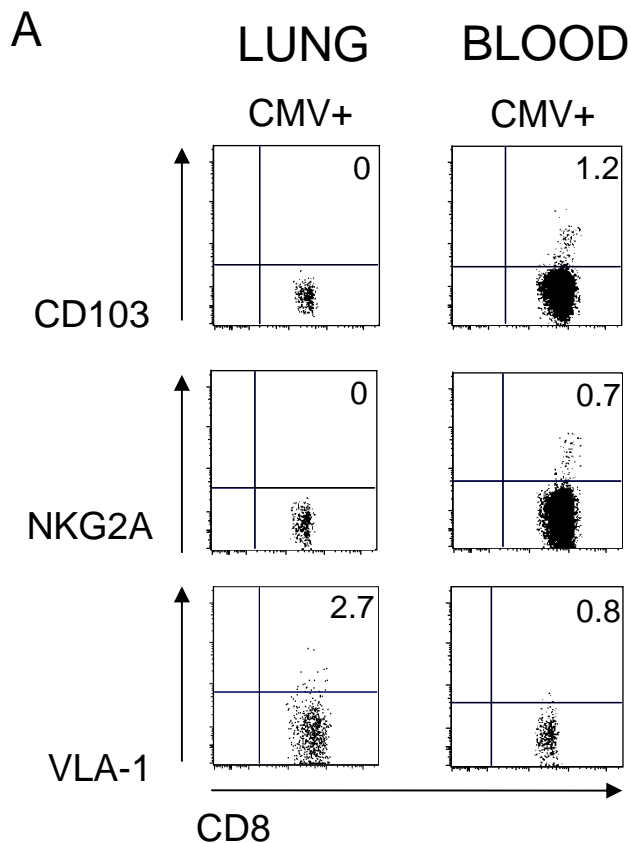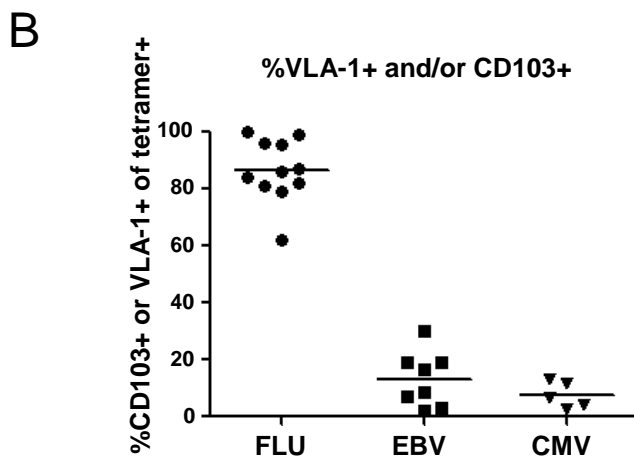

**SUPPLEMENTAL FIGURE 2. CMV-specific lung CD8<sup>+</sup> T cells lack the expression of CD103, VLA-1 and NKG2A.** A: Representative FACS-plots for phenotype of lung (left) and peripheral blood (right) CMV-specific CD8<sup>+</sup> T cells. Plots are representative for 5-6 patients per staining. FACS-plots are gated on tetramer<sup>+</sup> cells. Numbers indicate % of tetramer<sup>+</sup> cells that is CD103<sup>+</sup>, NKG2A<sup>+</sup> or VLA-1<sup>+</sup>. B: Percentages of influenza specific (mean 87%), EBV-specific (mean 13%) and CMV-specific (mean 8%) lung CD8<sup>+</sup> T cells expressing CD103 and/or VLA-1, as assessed by flow cytometry (n = 5-9 per virus-specificity). Bars represent the mean.

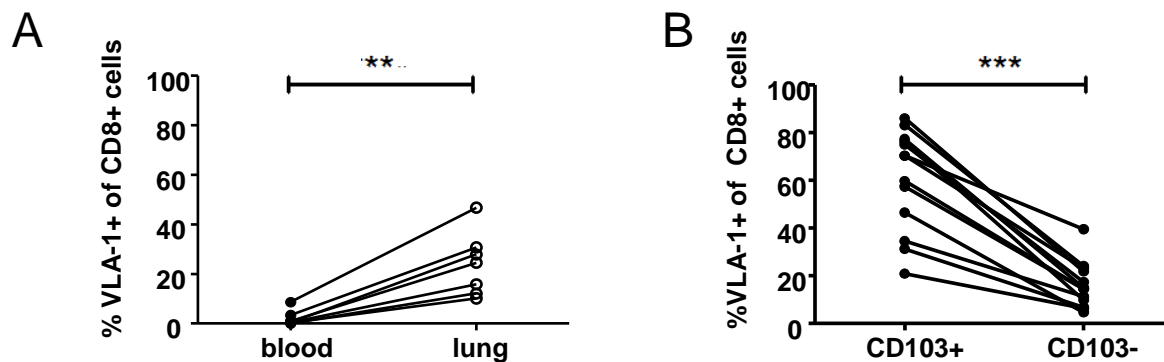

**SUPPLEMENTAL FIGURE 3. VLA-1 is expressed higher on lung CD8+ T cells than on blood CD8+ T cells and is mainly expressed on CD103+CD8+ T cells.** A: The percentage of CD8+ T cells in paired blood and lung samples expressing VLA-1 (n=7). B: The percentage of CD103+ and CD103- lung CD8+ T cells expressing VLA-1 (n=13). Expression was measured by flow cytometry. CD8+ T cells were gated as the CD3+CD8+ fraction within the lymphocytegate. \*\* p=0.001, \*\*\*p<0.0001.

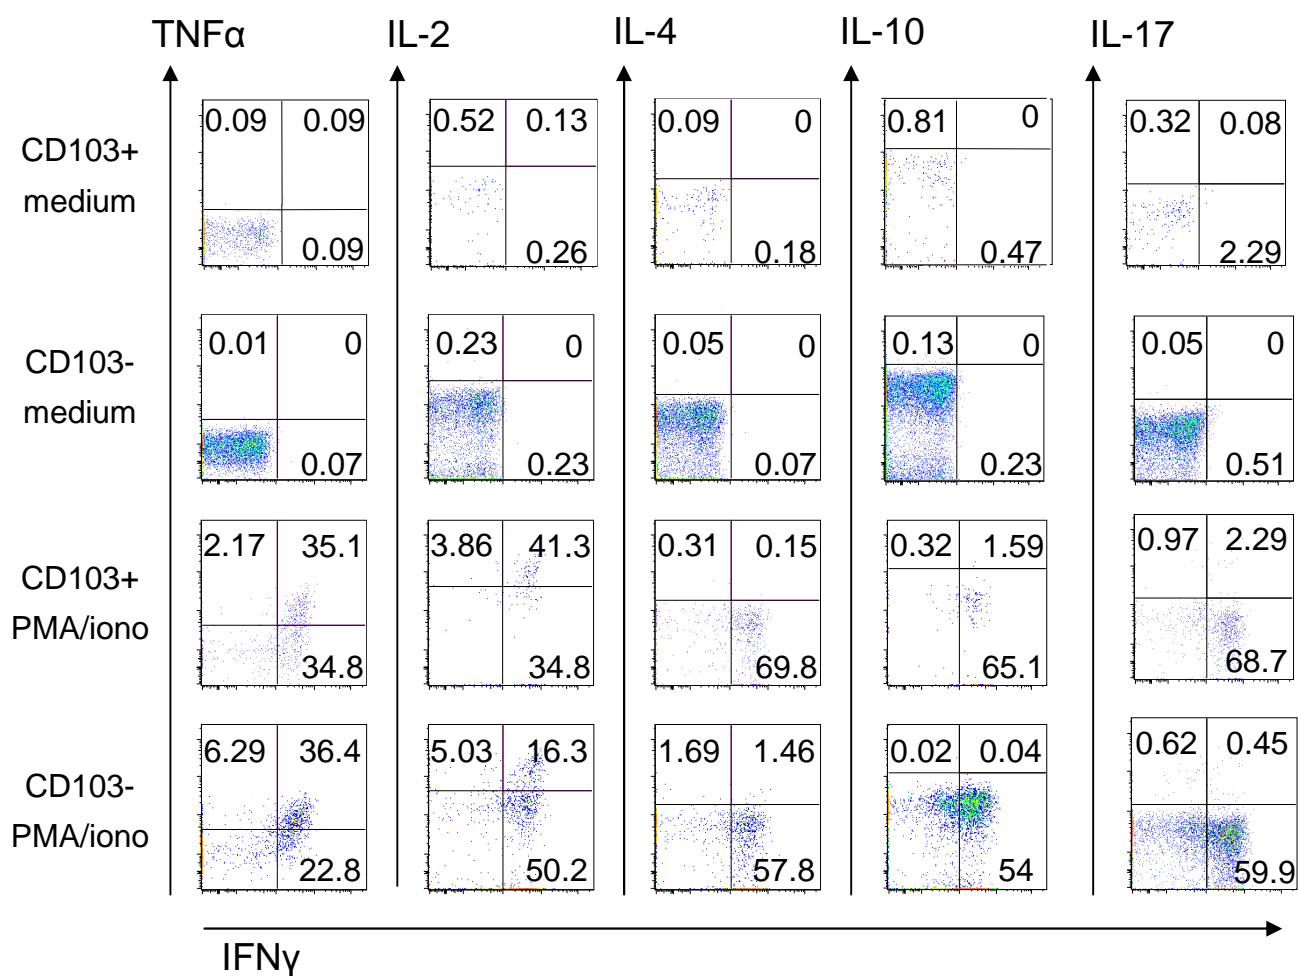

**SUPPLEMENTAL FIGURE 4. CD103+ and CD103- lung CD8+ T cells produce high amounts of IFN $\gamma$  and other Th1 cytokines, but hardly any Th2 cytokines, IL-10 or IL-17.**

FACS-plots representative for Figure 4A (4-10 patients). Dotplots were gated on CD3+CD8+CD103+ or CD3+CD8+CD103- cells within the lymphocytegate. Numbers indicate % of CD3+CD8+ cells within each quadrant. PMA/iono: cells stimulated with PMA and ionomycin.

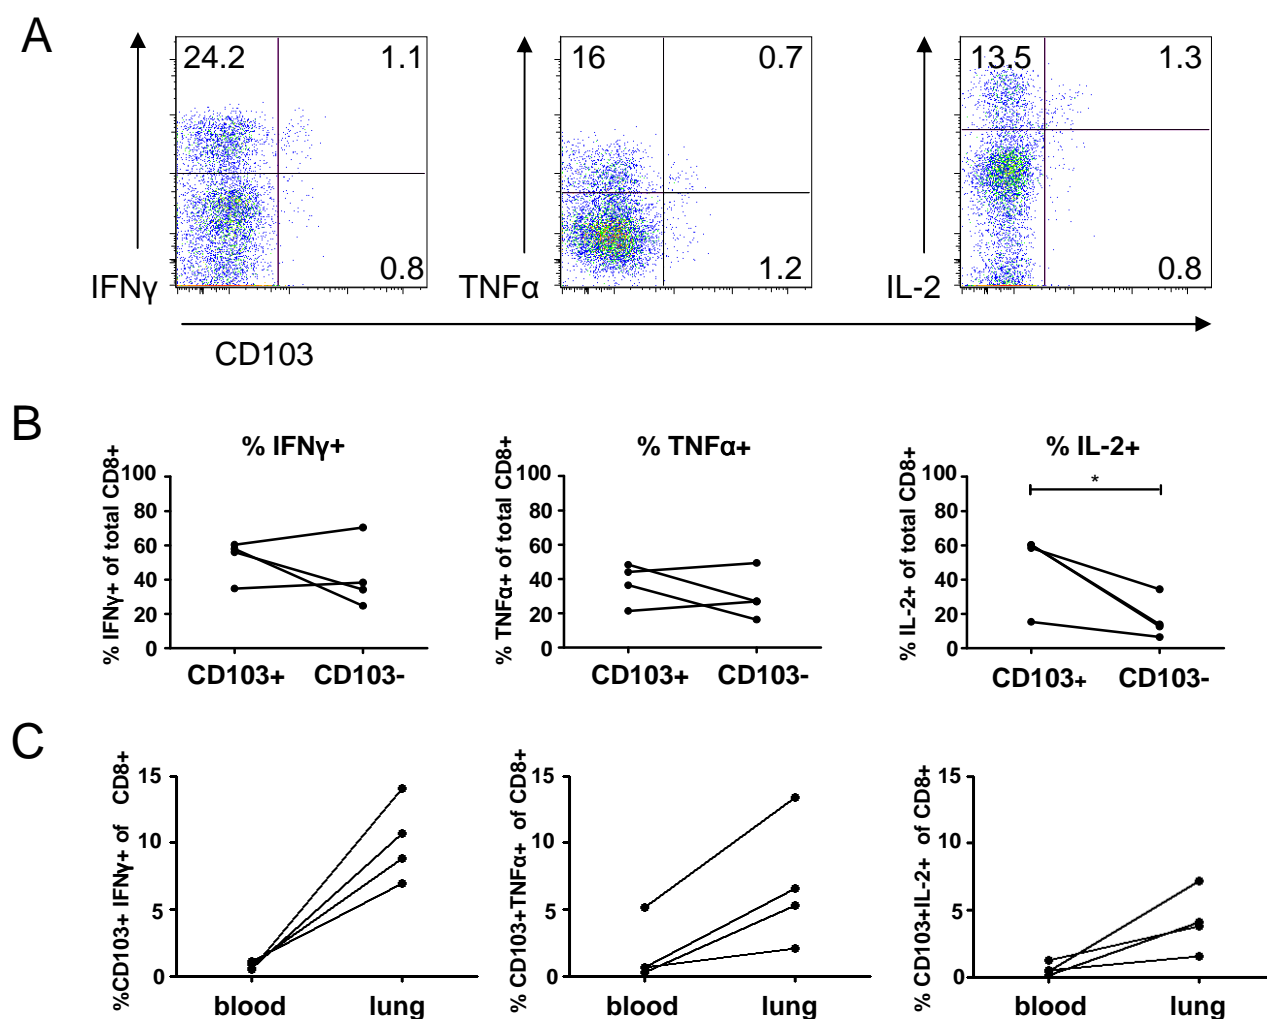

**SUPPLEMENTAL FIGURE 5. Equal percentages of CD103+ and CD103- peripheral blood CD8+ T cells produce IFN $\gamma$ .** A: FACS-plots show the expression of IFN $\gamma$ , TNF $\alpha$  and IL-2 plotted against CD103 expression. Plots show CD3+CD8+ peripheral blood T cells within the lymphocyte gate and are representative for 4 patients. Intracellular cytokine production of lung CD8+ T cells was measured by flow cytometry after 4 hours stimulation with PMA and ionomycin in the presence of Brefeldin A. Numbers indicate % of CD3+CD8+ cells within each quadrant. B: The percentage of CD103+CD8+ and CD103-CD8+ peripheral blood T cells expressing IFN $\gamma$ , TNF $\alpha$  and IL-2 (n = 4). C: The percentage of blood and lung CD8+ T cells that is double positive for CD103 and IFN $\gamma$ , TNF $\alpha$  or IL-2 (n = 4). All expression data were collected with flow cytometry. \* p= 0.04.

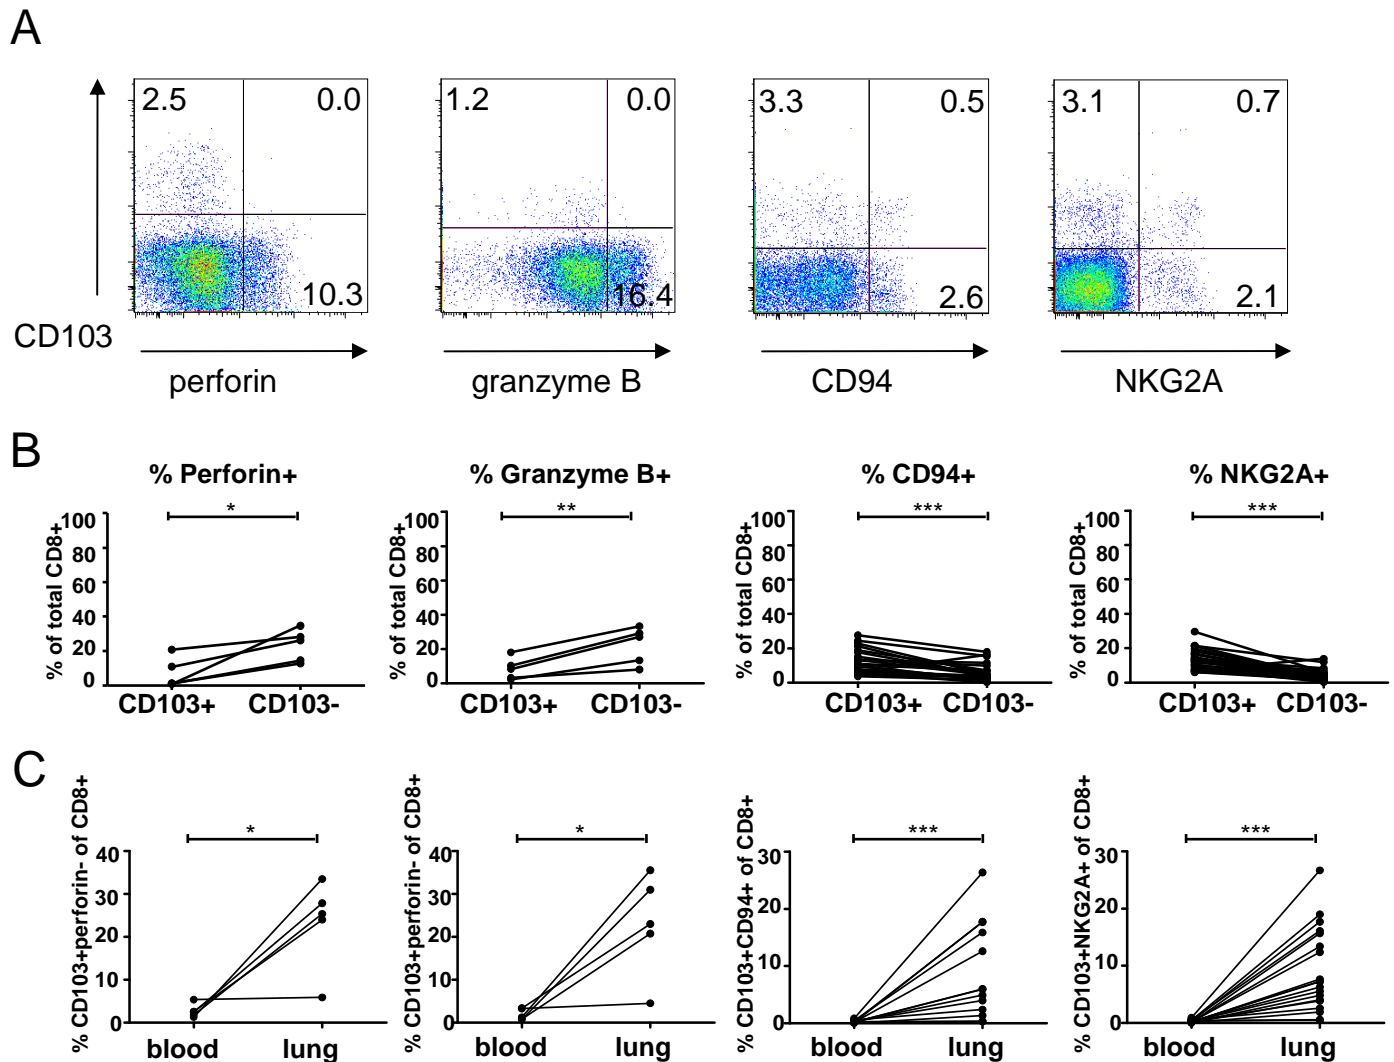

**SUPPLEMENTAL FIGURE 6. The small population of CD8<sup>+</sup>CD103<sup>+</sup> peripheral blood T cells has a lower expression of cytotoxic molecules and a higher expression of CD94/NKG2A than CD8<sup>+</sup>CD103<sup>-</sup> T cells.** A: FACS-plots show the expression of perforin, granzyme B, CD94 and NKG2A plotted against CD103 expression. Plots show CD3<sup>+</sup>CD8<sup>+</sup> peripheral blood T cells within the lymphocyte gate and are representative for 5-25 patients. Numbers indicate % of CD3<sup>+</sup>CD8<sup>+</sup> cells within each quadrant. B: The percentage of CD103<sup>+</sup>CD8<sup>+</sup> and CD103<sup>-</sup>CD8<sup>+</sup> peripheral blood T cells expressing perforin, granzyme B, CD94 and NKG2A (n = 5-25). C: The percentage of blood and lung CD8<sup>+</sup> T cells that is CD103<sup>+</sup> and perforin<sup>-</sup>, granzyme B<sup>-</sup>, CD94<sup>+</sup> or NKG2A<sup>+</sup> (n = 5-25). All expression data were collected with flow cytometry. \*\*\* p < 0.001, \*\* p = 0.007 and \* p = 0.02.
